# Supplementary material for: Dark field nanoparticle tracking analysis for size characterization of plasmonic and non-plasmonic particles
Source: PubMed Central journal article supplement (PMC4021069; doi:10.1007/s11051-014-2419-x), 2014-05-01
Supplement: 11051_2014_2419_MOESM1_ESM.pdf [file 11051_2014_2419_MOESM1_ESM.pdf]

# Supplementary Information for „Dark field nanoparticle tracking analysis for size characterization of plasmonic and non plasmonic particles“

## 0. General

This document contains some information helpful to reproduce the measurements. The tables in section 2 specify all software settings used for the measurements. The references to the analyzed video files are listed in the table row “Source”. The video files are online available and under a creative commons licence. To reproduce the measurements you have to install Fiji/ImageJ and also the NanoTrackJ plugin. The version used in this paper is available under:

*NanoTrackJ: Size characterization of freely diffusing nanoparticles by nanoparticle tracking.* Thorsten Wagner, Martin Wiemann, Hans-Gerd Lipinski. [figshare](http://dx.doi.org/10.6084/m9.figshare.805052).  
<http://dx.doi.org/10.6084/m9.figshare.805052>

## 1. Naming convention

All files are named according to the following convention:

Type\_T-X\_C-X\_FPS-X  
with

- Type
  - DF = Dark Field (Cytoviva Condensor on an Olympus BX51 microscope)
  - NS = NanoSight LM 10 (green laser)
- P-X = Particle
  - P-Au: Gold
  - P-Ps: Polystyrol
- S-X = Nominal particle size in nm
- T-X = Temperatur in C°
- C-X = Camera Type
  - C-A: Andor-DL-658-OEM
  - C-E: PCO Pixelfly Edge
  - C-O: Canon EOS 5D Mark II
- FPS-X = Frames per Second

## 2. Software settings to reproduce the results

**Figure 1A:**

|            |                                                                                                                                                                                                                                                                                               |
|------------|-----------------------------------------------------------------------------------------------------------------------------------------------------------------------------------------------------------------------------------------------------------------------------------------------|
| Software   | Nanosight NTA 2.3                                                                                                                                                                                                                                                                             |
| Video file | NS_P-Ps_S-100_T-22_C-A_FPS-30.avi (first 1800 frames)                                                                                                                                                                                                                                         |
| Source     | Wagner, Thorsten; Wiemann, Martin; Lipinski, Hans-Gerd (2013): Video recording of freely diffusing 100nm polystyrene nanoparticles using nanoparticle tracking analysis. figshare.<br><a href="http://dx.doi.org/10.6084/m9.figshare.879651">http://dx.doi.org/10.6084/m9.figshare.879651</a> |

The settings used for this plot can be found in the supplementary files named as the video on the Journal website.

**Figure 1B:**

|                                 |                                                                                                                                                                                                                                                                                               |
|---------------------------------|-----------------------------------------------------------------------------------------------------------------------------------------------------------------------------------------------------------------------------------------------------------------------------------------------|
| Software                        | NanoTrackJ                                                                                                                                                                                                                                                                                    |
| Video file                      | NS_P-Ps_S-100_T-22_C-A_FPS-30.avi (first 1800 frames)                                                                                                                                                                                                                                         |
| Source                          | Wagner, Thorsten; Wiemann, Martin; Lipinski, Hans-Gerd (2013): Video recording of freely diffusing 100nm polystyrene nanoparticles using nanoparticle tracking analysis. figshare.<br><a href="http://dx.doi.org/10.6084/m9.figshare.879651">http://dx.doi.org/10.6084/m9.figshare.879651</a> |
| Center estimator                | Maxima                                                                                                                                                                                                                                                                                        |
| Diffusion coefficient estimator | Covariance                                                                                                                                                                                                                                                                                    |
| Min. expected particle size     | 90 nm                                                                                                                                                                                                                                                                                         |
| Searching radius                | 13.34 px                                                                                                                                                                                                                                                                                      |
| Min. number of steps per track  | 20                                                                                                                                                                                                                                                                                            |
| Temperature                     | 22,5 °C                                                                                                                                                                                                                                                                                       |
| Pixel size                      | 164 nm                                                                                                                                                                                                                                                                                        |
| Frame rate                      | 30 FPS                                                                                                                                                                                                                                                                                        |
| Linear drift corrected          | True                                                                                                                                                                                                                                                                                          |
| Walker's method used:           | True                                                                                                                                                                                                                                                                                          |
| Walker's method min size:       | 800nm                                                                                                                                                                                                                                                                                         |
| Mean size (Maxima Dialog)       | 3                                                                                                                                                                                                                                                                                             |
| Tolerance (Maxima Dialog)       | 15                                                                                                                                                                                                                                                                                            |

**Figure 1C:**

|            |                                                                                                                                                                                                                                                                                               |
|------------|-----------------------------------------------------------------------------------------------------------------------------------------------------------------------------------------------------------------------------------------------------------------------------------------------|
| Software   | Nanosight NTA 2.3                                                                                                                                                                                                                                                                             |
| Video file | NS_P-Ps_S-200_T-24_C-A_FPS-30.avi                                                                                                                                                                                                                                                             |
| Source     | Wagner, Thorsten; Wiemann, Martin; Lipinski, Hans-Gerd (2013): Video recording of freely diffusing 200nm polystyrene nanoparticles using nanoparticle tracking analysis. figshare.<br><a href="http://dx.doi.org/10.6084/m9.figshare.879662">http://dx.doi.org/10.6084/m9.figshare.879662</a> |

The settings used for this plot can be found in the supplementary files named as the video on the Journal website.

**Figure 1D:**

|                                 |                                                                                                                                                                                                                                                                                               |
|---------------------------------|-----------------------------------------------------------------------------------------------------------------------------------------------------------------------------------------------------------------------------------------------------------------------------------------------|
| Software                        | NanoTrackJ                                                                                                                                                                                                                                                                                    |
| Video file                      | NS_P-Ps_S-200_T-24_C-A_FPS-30.avi                                                                                                                                                                                                                                                             |
| Source                          | Wagner, Thorsten; Wiemann, Martin; Lipinski, Hans-Gerd (2013): Video recording of freely diffusing 200nm polystyrene nanoparticles using nanoparticle tracking analysis. figshare.<br><a href="http://dx.doi.org/10.6084/m9.figshare.879662">http://dx.doi.org/10.6084/m9.figshare.879662</a> |
| Center estimator                | Maxima                                                                                                                                                                                                                                                                                        |
| Diffusion coefficient estimator | Covariance                                                                                                                                                                                                                                                                                    |

|                                |          |
|--------------------------------|----------|
| Min. expected particle size    | 190nm    |
| Searching radius               | 9.37 px  |
| Min. number of steps per track | 20       |
| Temperature                    | 24.05 °C |
| Pixel size                     | 164 nm   |
| Frame rate                     | 30 FPS   |
| Linear drift corrected         | True     |
| Walker's method used:          | True     |
| Walker's method min size:      | 800 nm   |
| Mean size (Maxima Dialog)      | 4        |
| Tolerance (Maxima Dialog)      | 27       |

**Figure 2 (left):**

|                                 |                                                                                                                                                                                                                                                                                      |
|---------------------------------|--------------------------------------------------------------------------------------------------------------------------------------------------------------------------------------------------------------------------------------------------------------------------------------|
| Software                        | NanoTrackJ                                                                                                                                                                                                                                                                           |
| Video file                      | DF_P-Ps_S-100_T-24_C-E_FPS-30.avi                                                                                                                                                                                                                                                    |
| Source                          | Wagner, Thorsten; Wiemann, Martin; Lipinski, Hans-Gerd (2013): Video recording of freely diffusing 100nm polystyrene nanoparticles using dark field microscopy. figshare.<br><a href="http://dx.doi.org/10.6084/m9.figshare.878145">http://dx.doi.org/10.6084/m9.figshare.878145</a> |
| Center estimator                | Maxima                                                                                                                                                                                                                                                                               |
| Diffusion coefficient estimator | Covariance                                                                                                                                                                                                                                                                           |
| Min. expected particle size     | 90nm                                                                                                                                                                                                                                                                                 |
| Searching radius                | 35.44 px                                                                                                                                                                                                                                                                             |
| Min. number of steps per track  | 20                                                                                                                                                                                                                                                                                   |
| Temperature                     | 24 °C                                                                                                                                                                                                                                                                                |
| Pixel size                      | 63 nm                                                                                                                                                                                                                                                                                |
| Frame rate                      | 30 FPS                                                                                                                                                                                                                                                                               |
| Linear drift corrected          | True                                                                                                                                                                                                                                                                                 |
| Walker's method used:           | True                                                                                                                                                                                                                                                                                 |
| Walker's method min size:       | 800 nm                                                                                                                                                                                                                                                                               |
| Mean size (Maxima Dialog)       | 1                                                                                                                                                                                                                                                                                    |
| Tolerance (Maxima Dialog)       | 5                                                                                                                                                                                                                                                                                    |

**Figure 2 (right):**

|            |                                                                                                                                             |
|------------|---------------------------------------------------------------------------------------------------------------------------------------------|
| Software   | NanoTrackJ                                                                                                                                  |
| Video file | DF_P-Ps_S-200_T-25_C-E_FPS-30.avi                                                                                                           |
| Source     | Video recording of freely diffusing 200nm polystyrene nanoparticles using dark field microscopy. Thorsten Wagner, Martin Wiemann, Hans-Gerd |

|                                 |                                                                                                                                |
|---------------------------------|--------------------------------------------------------------------------------------------------------------------------------|
|                                 | Lipinski. Figshare.<br><a href="http://dx.doi.org/10.6084/m9.figshare.878107">http://dx.doi.org/10.6084/m9.figshare.878107</a> |
| Center estimator                | Maxima                                                                                                                         |
| Diffusion coefficient estimator | Covariance                                                                                                                     |
| Min. expected particle size     | 190 nm                                                                                                                         |
| Searching radius                | 24.72 px                                                                                                                       |
| Min. number of steps per track  | 20                                                                                                                             |
| Temperature                     | 25 °C                                                                                                                          |
| Pixel size                      | 63 nm                                                                                                                          |
| Frame rate                      | 30 FPS                                                                                                                         |
| Linear drift corrected          | True                                                                                                                           |
| Walker's method used:           | True                                                                                                                           |
| Walker's method min size:       | 800 nm                                                                                                                         |
| Mean size (Maxima Dialog)       | 1                                                                                                                              |
| Tolerance (Maxima Dialog)       | 9                                                                                                                              |

**Figure 4:**

|                                 |                                                                                                                                                                                                                                                                                         |
|---------------------------------|-----------------------------------------------------------------------------------------------------------------------------------------------------------------------------------------------------------------------------------------------------------------------------------------|
| Software                        | NanoTrackJ                                                                                                                                                                                                                                                                              |
| Video file                      | DF_P-Au_S-60_T-24_C-O_FPS-25.tif                                                                                                                                                                                                                                                        |
| Source                          | Wagner, Thorsten; Wiemann, Martin; Lipinski, Hans-Gerd (2013): Video recording of freely diffusing 60 nm and 80 nm gold nanoparticles using dark field microscopy. figshare.<br><a href="http://dx.doi.org/10.6084/m9.figshare.879664">http://dx.doi.org/10.6084/m9.figshare.879664</a> |
| Center estimator                | Maxima                                                                                                                                                                                                                                                                                  |
| Diffusion coefficient estimator | Covariance                                                                                                                                                                                                                                                                              |
| Min. expected particle size     | 50 nm                                                                                                                                                                                                                                                                                   |
| Searching radius                | 18.03 px                                                                                                                                                                                                                                                                                |
| Min. number of steps per track  | 20                                                                                                                                                                                                                                                                                      |
| Temperature                     | 24 °C                                                                                                                                                                                                                                                                                   |
| Pixel size                      | 182 nm                                                                                                                                                                                                                                                                                  |
| Frame rate                      | 25 FPS                                                                                                                                                                                                                                                                                  |
| Linear drift corrected          | True                                                                                                                                                                                                                                                                                    |
| Walker's method used:           | True                                                                                                                                                                                                                                                                                    |
| Walker's method min size:       | 800 nm                                                                                                                                                                                                                                                                                  |
| Mean size (Maxima Dialog)       | 4                                                                                                                                                                                                                                                                                       |
| Tolerance (Maxima Dialog)       | 12                                                                                                                                                                                                                                                                                      |

**Figure 5:**

Same configuration as used for figure 4. The orange colored distribution was measured using the color threshold with an upper hue of 60 and a lower hue of 0.

The green colored distribution was measured using the color threshold with an upper hue of 285 and a lower hue of 60.
